# Supplementary material for: Screening candidate microRNA-mRNA regulatory pairs for predicting the response to chemoradiotherapy in rectal cancer by a bioinformatics approach
Source: PubMed Central journal article supplement (PMC5595906; doi:10.1038/s41598-017-11840-7), 2017-09-12
Supplement: 41598_2017_11840_MOESM1_ESM.pdf [file 41598_2017_11840_MOESM1_ESM.pdf]

# **Screening candidate microRNA-mRNA regulatory pairs for predicting the response to chemoradiotherapy in rectal cancer by a bioinformatics approach**

Qiliang Peng<sup>1,2,3,4,\*</sup>, Junjia Zhu<sup>5,6,\*</sup>, Peipei Shen<sup>1,2,3,4</sup>, Wenyan Yao<sup>1,2,3,4</sup>, Yu Lei<sup>1,2,3,4</sup>, Li Zou<sup>1,2,3,4</sup>, Yingying Xu<sup>1,2,3,4</sup>, Yuntian Shen<sup>1,2,3,4</sup>, Yaqun Zhu<sup>1,2,3,4</sup>

<sup>1</sup>Department of Radiotherapy & Oncology, The Second Affiliated Hospital of Soochow University, Suzhou, China

<sup>2</sup>Institute of Radiotherapy & Oncology, Soochow University, Suzhou, China

<sup>3</sup>Suzhou Key Laboratory for Radiation Oncology, Suzhou, China

<sup>4</sup>Suzhou Medical Center of Radiotherapy & Oncology, Suzhou, China

<sup>5</sup>Department of Anorectal Surgery, The Affiliated Jiangyin Hospital of Southeast University Medical College, Jiangyin, China

<sup>6</sup>Department of General Surgery, The Second Affiliated Hospital of Soochow University, Suzhou, China.

\*These authors contributed equally to this work.

Correspondence to: Yaqun Zhu, Dept. of Radiotherapy & Oncology, the Second Affiliated Hospital of Soochow University, San Xiang Road No. 1055, Suzhou, Jiangsu 215004, China

Phone: +86-512-67784826

Fax: +86-512-68284303

Email: szzhuyaun@sina.com

**Supplementary Information**

**Table S1: The miRNA-mRNA regulatory pairs.**

| <b>miRNA ID</b> | <b>mRNA ID</b> |
|-----------------|----------------|
| miR-630         | KIAA1324       |
| miR-630         | MEF2D          |
| miR-630         | EP300          |
| miR-630         | BHLHB2         |
| miR-630         | VIL2           |
| miR-630         | SOCS2          |
| miR-630         | ALDOB          |
| miR-630         | TEX264         |
| miR-630         | KCNMA1         |
| miR-630         | PTCD2          |
| miR-630         | TJP1           |
| miR-630         | HSPB8          |
| miR-630         | FKBP3          |
| miR-630         | GSTT2          |
| miR-630         | KCNK1          |
| miR-630         | NPAS2          |
| miR-630         | RBMX           |
| miR-630         | RBM4           |
| miR-630         | MSMB           |
| miR-630         | VPS35          |
| miR-630         | HDAC6          |
| miR-630         | SULT2A1        |
| miR-630         | ZMYM2          |
| miR-630         | KALRN          |
| miR-630         | ATP6V0C        |
| miR-630         | YIPF6          |
| miR-630         | PIK3R1         |
| miR-630         | SMEK1          |
| miR-630         | MAP3K2         |
| miR-630         | TAC3           |
| miR-630         | FKBP1B         |
| miR-630         | PRDM13         |
| miR-630         | TFAP2B         |
| miR-630         | PSMA1          |
| miR-630         | SPRY1          |
| miR-630         | SERF2          |
| miR-630         | TAGLN3         |
| miR-630         | ATP1A1         |
| miR-630         | BCOR           |
| miR-630         | BCL2           |

*(Continued )*

| <b>miRNA ID</b> | <b>mRNA ID</b> |
|-----------------|----------------|
| miR-630         | BBOX1          |
| miR-630         | MBNL2          |
| miR-630         | CENTG2         |
| miR-630         | SNTG2          |
| miR-630         | SNTB2          |
| miR-630         | KRT24          |
| miR-630         | KRT83          |
| miR-630         | UTP6           |
| miR-630         | SEMA3D         |
| miR-630         | SEMA7A         |
| miR-630         | TMEM156        |
| miR-630         | ARMC8          |
| miR-630         | ARL8B          |
| miR-630         | PPP2R5B        |
| miR-630         | AKAP11         |
| miR-630         | TFG            |
| miR-630         | KIAA0146       |
| miR-630         | EZH2           |
| miR-630         | PPP1R3C        |
| miR-630         | TBP            |
| miR-630         | CASQ1          |
| miR-630         | CSAD           |
| miR-630         | CRISP3         |
| miR-630         | PCDH11X        |
| miR-630         | YTHDF1         |
| miR-630         | ASPA           |
| miR-630         | WTAP           |
| miR-630         | NMU            |
| miR-630         | LRP6           |
| miR-630         | ARF4           |
| miR-630         | GNL3L          |
| miR-630         | CLPS           |
| miR-630         | HIST1H2AE      |
| miR-630         | TIPRL          |
| miR-630         | VTCN1          |
| miR-630         | CLK2           |
| miR-630         | PRG4           |
| miR-630         | CACNA1G        |
| miR-630         | LAPTM4A        |
| miR-630         | SEC61G         |

(Continued )

| <b>miRNA ID</b> | <b>mRNA ID</b> |
|-----------------|----------------|
| miR-630         | CDC27          |
| miR-630         | SNAI2          |
| miR-630         | GALNT1         |
| miR-630         | SENP3          |
| miR-630         | LMNB1          |
| miR-630         | COMMD10        |
| miR-630         | PUM1           |
| miR-630         | VIM            |
| miR-630         | KIF2A          |
| miR-630         | USP34          |
| miR-630         | ANKHD1         |
| miR-630         | CA2            |
| miR-630         | SPINK5         |
| miR-630         | CBX5           |
| miR-630         | CAST           |
| miR-630         | YAP1           |
| miR-630         | HMGCR          |
| miR-630         | BCL2L2         |
| miR-630         | DNAJC13        |
| miR-630         | STAG2          |
| miR-630         | TOMM7          |
| miR-630         | FAM12B         |
| miR-630         | PLK1           |
| miR-630         | NEO1           |
| miR-630         | FCER1A         |
| miR-630         | TDRKH          |
| miR-630         | PAWR           |
| miR-630         | ZNF187         |
| miR-630         | KDR            |
| miR-630         | PAEP           |
| miR-630         | ZNF410         |
| miR-630         | ZNF384         |
| miR-630         | IL10           |
| miR-630         | GIPC1          |
| miR-630         | FAM98A         |
| miR-630         | ZNF536         |
| miR-630         | PDCL           |
| miR-630         | DCP1A          |
| miR-630         | ERICH1         |
| miR-630         | CEP192         |

(Continued )

| <b>miRNA ID</b> | <b>mRNA ID</b> |
|-----------------|----------------|
| miR-630         | ZNF711         |
| miR-202-3p      | ZMYM2          |
| miR-202-3p      | SMAP1          |
| miR-202-3p      | SSU72          |
| miR-202-3p      | TRIM71         |
| miR-202-3p      | NGLY1          |
| miR-202-3p      | PVRL3          |
| miR-202-3p      | SNX5           |
| miR-202-3p      | ZNF193         |
| miR-202-3p      | ISG20L2        |
| miR-202-3p      | HPCAL1         |
| miR-202-3p      | CEP55          |
| miR-202-3p      | HSD17B11       |
| miR-202-3p      | C1orf43        |
| miR-202-3p      | SRGN           |
| miR-202-3p      | FKRP           |
| miR-202-3p      | LARP7          |
| miR-202-3p      | RPL23A         |
| miR-202-3p      | TCOF1          |
| miR-202-3p      | SLMAP          |
| miR-202-3p      | H2AFZ          |
| miR-202-3p      | MTHFD2         |
| miR-202-3p      | GABBR1         |
| miR-202-3p      | TAF9           |
| miR-202-3p      | MTMR4          |
| miR-202-3p      | SULF2          |
| miR-202-3p      | KLF12          |
| miR-202-3p      | SMNDC1         |
| miR-202-3p      | DDX50          |
| miR-202-3p      | HIGD2A         |
| miR-202-3p      | MON2           |
| miR-202-3p      | POLR3D         |
| miR-202-3p      | DNAJB11        |
| miR-202-3p      | ATXN10         |
| miR-202-3p      | RBM9           |
| miR-202-3p      | RBM4           |
| miR-202-3p      | CHPT1          |
| miR-202-3p      | PBX3           |
| miR-202-3p      | EEF1A1         |
| miR-202-3p      | PANX2          |

(Continued )

| <b>miRNA ID</b> | <b>mRNA ID</b> |
|-----------------|----------------|
| miR-202-3p      | ZSWIM4         |
| miR-202-3p      | TRIM5          |
| miR-202-3p      | FUS            |
| miR-202-3p      | MYCN           |
| miR-202-3p      | IRF8           |
| miR-202-3p      | C21orf63       |
| miR-202-3p      | DBT            |
| miR-202-3p      | ZBTB10         |
| miR-202-3p      | RNPS1          |
| miR-202-3p      | PCNA           |
| miR-202-3p      | C18orf21       |
| miR-202-3p      | SLC31A2        |
| miR-202-3p      | EDC4           |
| miR-202-3p      | SENP2          |
| miR-202-3p      | NR2F2          |
| miR-202-3p      | TMEM138        |
| miR-202-3p      | SF3A3          |
| miR-202-3p      | GTPBP2         |
| miR-202-3p      | CKAP5          |
| miR-202-3p      | HNRPC          |
| miR-202-3p      | POLQ           |
| miR-202-3p      | VGLL3          |
| miR-202-3p      | BBS10          |
| miR-202-3p      | LRRC41         |
| miR-202-3p      | IVNS1ABP       |
| miR-202-3p      | TEX261         |
| miR-202-3p      | PYGO2          |
| miR-202-3p      | ARMCX5         |
| miR-202-3p      | CANT1          |
| miR-202-3p      | KLHDC3         |
| miR-202-3p      | SMUG1          |
| miR-202-3p      | HIPK2          |
| miR-202-3p      | SPCS1          |
| miR-202-3p      | MAP3K1         |
| miR-202-3p      | HTATIP2        |
| miR-202-3p      | DNAJC1         |
| miR-202-3p      | KLHL15         |
| miR-202-3p      | ASXL1          |
| miR-202-3p      | RAB2B          |
| miR-202-3p      | LSM6           |

(Continued )

| <b>miRNA ID</b> | <b>mRNA ID</b> |
|-----------------|----------------|
| miR-202-3p      | RNF13          |
| miR-202-3p      | C3orf63        |
| miR-202-3p      | SLC39A8        |
| miR-575         | SACS           |
| miR-575         | MS4A4A         |
| miR-575         | RAB6IP1        |
| miR-575         | EHMT2          |
| miR-575         | NR4A1          |
| miR-575         | PLAGL1         |
| miR-575         | PRKAG2         |
| miR-575         | RPS6KA1        |
| miR-575         | RPS6KA3        |
| miR-575         | PIK3CD         |
| miR-575         | RAB38          |
| miR-575         | CACNA2D1       |
| miR-575         | FKBP14         |
| miR-575         | GPR63          |
| miR-575         | TIPRL          |
| miR-575         | MAP2K1         |
| miR-575         | WDR57          |
| miR-575         | NRP1           |
| miR-575         | SLC14A1        |
| miR-575         | CHD3           |
| miR-575         | RLF            |
| miR-575         | KIAA1794       |
| miR-575         | CHRD           |
| miR-575         | ENPP2          |
| miR-575         | FGFR2          |
| miR-575         | TMC7           |
| miR-575         | TMEM4          |
| miR-575         | RGS3           |
| miR-575         | PPP1R15A       |
| miR-575         | UBAP2          |
| miR-575         | FAS            |
| miR-575         | CCNT2          |
| miR-575         | DCHS1          |
| miR-575         | TPT1           |
| miR-575         | HIF3A          |
| miR-575         | ANKRD46        |
| miR-575         | ANKRD49        |

(Continued )

| <b>miRNA ID</b> | <b>mRNA ID</b> |
|-----------------|----------------|
| miR-575         | SPINK5         |
| miR-575         | NDUFB1         |
| miR-575         | RBM14          |
| miR-575         | HMGA2          |
| miR-575         | MYO10          |
| miR-575         | TACSTD1        |
| miR-575         | STOML1         |
| miR-575         | MYO5A          |
| miR-575         | USP19          |
| miR-575         | VASP           |
| miR-575         | MID2           |
| miR-575         | IFNGR2         |
| miR-575         | DPP8           |
| miR-575         | KCTD13         |
| miR-575         | TBC1D17        |
| miR-575         | MRPS7          |
| miR-575         | COX6B1         |
| miR-575         | GALNT1         |
| miR-575         | POLD4          |
| miR-575         | ARPC4          |
| miR-575         | LMBRD1         |
| miR-575         | COPS2          |
| miR-575         | SNRPB          |
| miR-575         | FGF1           |
| miR-575         | ARIH2          |
| miR-575         | TUBG1          |
| miR-575         | UCHL5          |
| miR-575         | ACTR3B         |
| miR-765         | DTX2           |
| miR-765         | PSMA6          |
| miR-765         | IGSF1          |
| miR-765         | PFKFB3         |
| miR-765         | MAP3K4         |
| miR-765         | SLC25A37       |
| miR-765         | TACC2          |
| miR-765         | PDE1C          |
| miR-765         | ST3GAL2        |
| miR-765         | HNF4A          |
| miR-765         | GNL3L          |
| miR-765         | SV2A           |

(Continued )



| <b>miRNA ID</b> | <b>mRNA ID</b> |
|-----------------|----------------|
| miR-765         | BFSP2          |
| miR-765         | BCL6           |
| miR-765         | STK4           |
| miR-765         | BAG1           |
| miR-765         | TAOK3          |
| miR-765         | BAX            |
| miR-765         | NRBP1          |
| miR-765         | SCAMP3         |
| miR-765         | CFP            |
| miR-765         | IQCB1          |
| miR-765         | FAM117A        |
| miR-765         | KLK10          |
| miR-765         | IGFBP2         |
| miR-765         | TAGLN          |
| miR-765         | DNAJC7         |
| miR-765         | LIN7B          |
| miR-765         | TUBG1          |
| miR-765         | MGA            |
| miR-765         | SGCE           |
| miR-765         | FKBP1A         |
| miR-765         | LBP            |
| miR-765         | APOB           |
| miR-765         | FUS            |
| miR-765         | PIB5PA         |
| miR-765         | COLEC12        |
| miR-765         | LMNA           |
| miR-765         | LMO1           |
| miR-765         | EZH2           |
| miR-765         | CENPT          |
| miR-765         | NECAP2         |
| miR-765         | CSH2           |
| miR-765         | JARID1C        |
| miR-765         | MYO1A          |
| miR-765         | MYO1C          |
| miR-765         | USP19          |
| miR-765         | GAPVD1         |
| miR-765         | PUM1           |
| miR-765         | EIF4G1         |
| miR-765         | NRXN2          |
| miR-765         | NYX            |

(Continued )

| <b>miRNA ID</b> | <b>mRNA ID</b> |
|-----------------|----------------|
| miR-765         | BEXL1          |
| miR-765         | EIF2C1         |
| miR-765         | EPHB2          |
| miR-765         | PREB           |
| miR-765         | SPINK5         |
| miR-765         | NTRK3          |
| miR-765         | ADIPOR1        |
| miR-765         | PTGDS          |
| miR-765         | CYB5A          |
| miR-765         | NEU3           |
| miR-765         | SPTLC3         |
| miR-765         | GPC3           |
| miR-765         | NDUFA7         |
| miR-765         | SMARCA4        |
| miR-765         | ACTA2          |
| miR-765         | TRAF3IP2       |
| miR-765         | PVRL1          |
| miR-765         | SH2D2A         |
| miR-765         | WHSC1          |
| miR-765         | PCMT1          |
| miR-765         | CACNA1G        |
| miR-765         | XPNPEP1        |
| miR-765         | TPM3           |
| miR-765         | AGPAT7         |
| miR-765         | HTRA1          |
| miR-765         | RGS7           |
| miR-765         | SEMA6A         |
| miR-765         | PRPF3          |
| miR-765         | OSBPL7         |
| miR-765         | TLE4           |
| miR-765         | HOXC6          |
| miR-765         | HOXB8          |
| miR-765         | KIRREL         |
| miR-765         | HIF3A          |
| miR-765         | PRR13          |
| miR-765         | RBM4           |
| miR-765         | RALY           |
| miR-765         | BST1           |
| miR-765         | TIAL1          |
| miR-765         | CAPN3          |

(Continued )

| <b>miRNA ID</b> | <b>mRNA ID</b> |
|-----------------|----------------|
| miR-765         | CCDC51         |
| miR-765         | PPP4C          |
| miR-765         | PPP5C          |
| miR-765         | IDH1           |
| miR-765         | COX6B1         |
| miR-765         | TMEM160        |
| miR-513a-5p     | LITAF          |
| miR-513a-5p     | HOXD11         |
| miR-513a-5p     | MRPL14         |
| miR-513a-5p     | CLK2           |
| miR-513a-5p     | KIAA0802       |
| miR-513a-5p     | FYN            |
| miR-513a-5p     | FAM107B        |
| miR-513a-5p     | WTAP           |
| miR-513a-5p     | B7-H           |
| miR-513a-5p     | MBD6           |
| miR-513a-5p     | MBIP           |
| miR-513a-5p     | CD274          |
| miR-513a-5p     | TXNRD1         |
| miR-513a-5p     | APCDD1         |
| miR-513a-5p     | MIA3           |
| miR-513a-5p     | EWSR1          |
| miR-513a-5p     | HELLS          |
| miR-513a-5p     | MND1           |
| miR-513a-5p     | SLC25A5        |
| miR-513a-5p     | PPP1CA         |
| miR-513a-5p     | SERPINH1       |
| miR-513a-5p     | MAPKAPK3       |
| miR-513a-5p     | STMN1          |
| miR-198         | RAP1GAP        |
| miR-198         | NUMA1          |
| miR-198         | COL5A1         |
| miR-198         | EPS8L3         |
| miR-198         | BCL2L1         |
| miR-198         | FAT            |
| miR-198         | COL6A3         |
| miR-198         | BUB3           |
| miR-198         | FUS            |
| miR-198         | TARBP2         |
| miR-198         | MARCH2         |

(Continued )

| <b>miRNA ID</b> | <b>mRNA ID</b> |
|-----------------|----------------|
| miR-198         | BNC1           |
| miR-198         | SLC25A28       |
| miR-198         | DCX            |
| miR-198         | EPB41L1        |
| miR-198         | RGS10          |
| miR-198         | H3F3A          |
| miR-198         | CLU            |
| miR-198         | TCTA           |
| miR-198         | PIK3C2G        |
| miR-198         | TIMP1          |
| miR-198         | RB1            |
| miR-198         | CNOT3          |
| miR-198         | CD160          |
| miR-198         | CCNT1          |
| miR-198         | DPF1           |
| miR-198         | EPHA2          |
| miR-198         | PAPPA          |
| miR-198         | ARHGAP19       |
| miR-198         | MLL2           |
| miR-198         | FBXL5          |
| miR-198         | MYB            |
| miR-198         | SEMA7A         |
| miR-198         | TITF1          |
| miR-198         | DENND2D        |
| miR-198         | HOOK2          |
| miR-198         | LBP            |
| miR-198         | CDC14A         |
| miR-198         | CENPE          |
| miR-198         | VAT1           |
| miR-198         | SLC8A1         |
| miR-198         | TXNDC9         |
| miR-198         | PIGC           |
| miR-198         | NR2F6          |
| miR-198         | CTNNA3         |
| miR-198         | CD84           |
| miR-198         | FIP1L1         |
| miR-198         | CDK4           |
| miR-198         | CDK6           |
| miR-198         | FAM62A         |
| miR-198         | SPRY2          |

(Continued )

| <b>miRNA ID</b> | <b>mRNA ID</b> |
|-----------------|----------------|
| miR-198         | PSMD7          |
| miR-198         | PSME3          |
| miR-198         | PLAU           |
| miR-198         | RRAS           |
| miR-198         | MBNL2          |
| miR-198         | SLC35A2        |
| miR-198         | NFYA           |
| miR-198         | FAM46A         |
| miR-198         | SLC16A1        |
| miR-198         | GNB2           |
| miR-198         | GOLGB1         |
| miR-198         | CALU           |
| miR-198         | NDRG3          |
| miR-198         | PHKB           |
| miR-198         | GNL1           |
| miR-198         | FBLN2          |
| miR-198         | PHF8           |
| miR-198         | RNF4           |
| miR-198         | PAK2           |
| miR-198         | LIN7B          |
| miR-198         | TPST2          |
| miR-198         | ANG            |
| miR-198         | TMPO           |
| miR-198         | CSF2RA         |
| miR-198         | PBX1           |
| miR-198         | SAPS1          |
| miR-198         | CKMT1A         |
| miR-198         | CELSR2         |
| miR-198         | SNX17          |
| miR-198         | RCE1           |
| miR-198         | RFXANK         |
| miR-198         | ATXN1          |
| miR-198         | KRT76          |
| miR-198         | SEC24C         |
| miR-198         | SEC24B         |
| miR-198         | IL10           |
| miR-198         | TLE4           |
| miR-198         | TCF7L1         |
| miR-198         | CTSC           |
| miR-198         | CTNBL1         |

(Continued )

| <b>miRNA ID</b> | <b>mRNA ID</b> |
|-----------------|----------------|
| miR-198         | APH1A          |
| miR-198         | APEH           |
| miR-198         | ZNF281         |
| miR-198         | ZNF289         |
| miR-198         | IL11RA         |
| miR-198         | ARMC8          |
| miR-198         | HIVP2          |
| miR-198         | PCDH12         |
| miR-198         | PLXNA1         |
| miR-198         | VPS35          |
| miR-198         | NCKAP1L        |
| miR-198         | IFNGR2         |
| miR-198         | EIF4E2         |
| miR-198         | ARID1A         |
| miR-198         | NDUFC1         |
| miR-198         | GAPVD1         |
| miR-198         | ALPL           |
| miR-198         | TFCP2          |
| miR-198         | UFC1           |
| miR-198         | GPRC5C         |
| miR-198         | ZCCHC4         |
| miR-198         | H2AFX          |
| miR-198         | NTRK3          |
| miR-198         | AIM1L          |
| miR-198         | CLTA           |
| miR-198         | CRISP3         |
| miR-198         | GZMH           |
| miR-198         | JAM2           |
| miR-198         | PGAP1          |
| miR-198         | PTMS           |
| miR-198         | SMC1A          |
| miR-198         | NOL3           |
| miR-198         | SLITRK5        |
| miR-198         | CHD1           |
| miR-198         | CHD4           |
| miR-198         | ACHE           |
| miR-198         | ACE2           |
| miR-198         | ATG9A          |
| miR-198         | HPRT1          |
| miR-198         | ATG16L1        |

(Continued )

| <b>miRNA ID</b> | <b>mRNA ID</b> |
|-----------------|----------------|
| miR-198         | DHRS1          |
| miR-198         | PPA2           |
| miR-198         | SRGAP2         |
| miR-198         | RBM12          |
| miR-198         | ADH5           |
| miR-198         | RBM4B          |
| miR-198         | WNT7A          |
| miR-198         | BAI3           |
| miR-198         | CXCR7          |
| miR-198         | MAP4           |
| miR-198         | HABP2          |
| miR-198         | c-Myb          |
| miR-198         | USP16          |
| miR-198         | PTPRD          |
| miR-198         | BCL9           |
| miR-198         | WAC            |
| miR-198         | SH3GLB1        |
| miR-198         | LASS4          |
| miR-198         | TAZ            |
| miR-198         | STAU2          |
| miR-198         | DDR2           |
| miR-198         | SCD            |
| miR-198         | PPP2CB         |
| miR-198         | DFNB31         |
| miR-198         | PCDH1          |
| miR-198         | UBE2M          |
| miR-198         | PKD2L2         |
| miR-198         | URM1           |
| miR-198         | ITGB4BP        |
| miR-198         | RIMS3          |
| miR-198         | CDK2AP2        |
| miR-198         | PLAUR          |
| miR-198         | NXF1           |
| miR-198         | ARAF           |
| miR-198         | ARL6IP1        |
| miR-198         | SGSH           |
| miR-198         | FABP5          |
| miR-198         | SHC1           |
| miR-198         | ZDHHC6         |
| miR-198         | DCTN3          |

(Continued )

| <b>miRNA ID</b> | <b>mRNA ID</b> |
|-----------------|----------------|
| miR-198         | TBPL1          |
| miR-198         | M6PR           |
| miR-198         | CXCL13         |
| miR-483-5p      | RUSC2          |
| miR-483-5p      | FBN2           |
| miR-483-5p      | NRBP1          |
| miR-483-5p      | SILV           |
| miR-483-5p      | ARHGEF9        |
| miR-483-5p      | ZNF289         |
| miR-483-5p      | PPP2R1A        |
| miR-483-5p      | SHOX2          |
| miR-483-5p      | ALDOC          |
| miR-483-5p      | TFDP1          |
| miR-483-5p      | PABPN1         |
| miR-483-5p      | LYPLA2         |
| miR-483-5p      | VAMP8          |
| miR-483-5p      | FHL1           |
| miR-483-5p      | DBN1           |
| miR-483-5p      | CDKL3          |
| miR-483-5p      | PREP           |
| miR-483-5p      | B4GALT3        |
| miR-483-5p      | RBM35A         |
| miR-483-5p      | SAMD4A         |
| miR-483-5p      | JARID1C        |
| miR-483-5p      | TFAP2B         |
| miR-483-5p      | CHD1           |
| miR-483-5p      | NFX1           |
| miR-483-5p      | SMARCA2        |
| miR-483-5p      | UBE2D2         |
| miR-483-5p      | H2AFV          |
| miR-483-5p      | CTSK           |
| miR-483-5p      | SH3GL3         |
| miR-483-5p      | PDGFD          |
| miR-483-5p      | APBB2          |
| miR-483-5p      | ZCWPW1         |
| miR-483-5p      | CACNB1         |
| miR-483-5p      | KLHDC3         |
| miR-483-5p      | MRPL52         |
| miR-483-5p      | UCK2           |
| miR-483-5p      | DNAJC7         |

(Continued )



| <b>miRNA ID</b> | <b>mRNA ID</b> |
|-----------------|----------------|
| miR-483-5p      | PIP5K1A        |
| miR-483-5p      | RFC3           |
| miR-483-5p      | MTHFD2L        |
| miR-483-5p      | MAN1A2         |
| miR-483-5p      | GCC2           |
| miR-483-5p      | SLC25A15       |
| miR-483-5p      | RBM5           |
| miR-483-5p      | RGS12          |
| miR-483-5p      | RNF10          |
| miR-483-5p      | GNLY           |
| miR-483-5p      | NAB2           |
| miR-483-5p      | CD53           |
| miR-483-5p      | AP2M1          |
| miR-483-5p      | RHOA           |
| miR-483-5p      | MON1B          |
| miR-483-5p      | ADRBK1         |
| miR-483-5p      | FOXJ2          |
| miR-483-5p      | SLC23A2        |
| miR-483-5p      | MYO9B          |
| miR-483-5p      | USP48          |
| miR-483-5p      | BCAM           |
| miR-483-5p      | BAG1           |
| miR-483-5p      | MEA1           |
| miR-483-5p      | CITED2         |
| miR-483-5p      | PDE4DIP        |
| miR-483-5p      | PRIM2A         |
| miR-483-5p      | MLL            |
| miR-483-5p      | MAX            |
| miR-483-5p      | MAPK3          |
| miR-483-5p      | CD320          |
| miR-483-5p      | SON            |
| miR-483-5p      | SET            |
| miR-483-5p      | UBE2Z          |
| miR-483-5p      | DNMT1          |
| miR-483-5p      | CAMK2G         |
| miR-483-5p      | DRG1           |
| miR-483-5p      | ISGF3G         |
| miR-371a-5p     | BAG3           |
| miR-371a-5p     | ZNF564         |
| miR-371a-5p     | ZNF503         |

(Continued )

| <b>miRNA ID</b> | <b>mRNA ID</b> |
|-----------------|----------------|
| miR-371a-5p     | TBP            |
| miR-371a-5p     | ZNF644         |
| miR-371a-5p     | HTRA1          |
| miR-371a-5p     | SPTBN1         |
| miR-371a-5p     | SEC23A         |
| miR-371a-5p     | SLC35A5        |
| miR-371a-5p     | KIAA0907       |
| miR-371a-5p     | PSMC6          |
| miR-371a-5p     | ENOPH1         |
| miR-371a-5p     | BLMH           |
| miR-371a-5p     | MLL2           |
| miR-371a-5p     | C9orf23        |
| miR-371a-5p     | WBP11          |
| miR-371a-5p     | CAMK2G         |
| miR-371a-5p     | DNER           |
| miR-371a-5p     | MAT2B          |
| miR-371a-5p     | ZNHIT3         |
| miR-371a-5p     | GEMIN5         |
| miR-371a-5p     | VPS37C         |
| miR-371a-5p     | HBS1L          |
| miR-371a-5p     | BTG3           |
| miR-371a-5p     | CNOT3          |
| miR-371a-5p     | CITED2         |
| miR-371a-5p     | ITGB8          |
| miR-371a-5p     | BAZ1A          |
| miR-371a-5p     | DCP1A          |
| miR-371a-5p     | MYCN           |
| miR-371a-5p     | TLE4           |
| miR-371a-5p     | CCNC           |
| miR-371a-5p     | ZDHHC13        |
| miR-371a-5p     | ZDHHC23        |
| miR-371a-5p     | CBX4           |
| miR-371a-5p     | TUBB           |
| miR-371a-5p     | PHF2           |
| miR-371a-5p     | TTF1           |
| miR-371a-5p     | CALU           |
| miR-371a-5p     | NME4           |
| miR-371a-5p     | NDFIP1         |
| miR-371a-5p     | HMGN2          |
| miR-371a-5p     | AAMP           |

(Continued )

| <b>miRNA ID</b> | <b>mRNA ID</b> |
|-----------------|----------------|
| miR-371a-5p     | NGRN           |
| miR-371a-5p     | CKS2           |
| miR-371a-5p     | LEF1           |
| miR-371a-5p     | EPN1           |
| miR-371a-5p     | GHITM          |
| miR-371a-5p     | NUF2           |
| miR-371a-5p     | GSR            |
| miR-371a-5p     | GLRX2          |
| miR-371a-5p     | LRRC42         |
| miR-371a-5p     | COPS4          |
| miR-371a-5p     | CSNK1E         |
| miR-371a-5p     | CR2            |
| miR-371a-5p     | YTHDF1         |
| miR-371a-5p     | SIPA1L2        |
| miR-371a-5p     | TTC21B         |
| miR-371a-5p     | GOLGA7         |
| miR-371a-5p     | BECN1          |
| miR-371a-5p     | INTS3          |
| miR-371a-5p     | CTNNA1         |
| miR-371a-5p     | UNKL           |
| miR-671-5p      | SELP           |
| miR-671-5p      | LRP8           |
| miR-671-5p      | PIP5K2C        |
| miR-671-5p      | ESRRA          |
| miR-671-5p      | PIP5K3         |
| miR-671-5p      | ATF3           |
| miR-671-5p      | SEPT6          |
| miR-671-5p      | HLA-DRB1       |
| miR-671-5p      | PRPF31         |
| miR-671-5p      | GPR125         |
| miR-671-5p      | FGL1           |
| miR-671-5p      | SCMH1          |
| miR-671-5p      | NOS1           |
| miR-671-5p      | SPTBN1         |
| miR-671-5p      | SPTBN2         |
| miR-671-5p      | AKT2           |
| miR-671-5p      | SATB2          |
| miR-671-5p      | DNAJB5         |
| miR-671-5p      | BTNL8          |
| miR-671-5p      | HCN2           |

(Continued )

| <b>miRNA ID</b> | <b>mRNA ID</b> |
|-----------------|----------------|
| miR-671-5p      | COX5A          |
| miR-671-5p      | UBAP2L         |
| miR-671-5p      | SSBP1          |
| miR-671-5p      | RNF38          |
| miR-671-5p      | RAB13          |
| miR-671-5p      | ADD1           |
| miR-671-5p      | TSPYL2         |
| miR-671-5p      | DCTN2          |
| miR-671-5p      | PSG1           |
| miR-671-5p      | EIF2B3         |
| miR-671-5p      | CD34           |
| miR-671-5p      | PHF15          |
| miR-671-5p      | PKN2           |
| miR-671-5p      | ELP4           |
| miR-671-5p      | MYST1          |
| miR-671-5p      | TIPARP         |
| miR-671-5p      | SF1            |
| miR-671-5p      | CLINT1         |
| miR-671-5p      | CLEC4E         |
| miR-671-5p      | YWHAQ          |
| miR-671-5p      | IL10           |
| miR-671-5p      | BSDC1          |
| miR-671-5p      | RAP1GDS1       |
| miR-671-5p      | LYZL6          |
| miR-671-5p      | MYL6           |
| miR-671-5p      | MAX            |
| miR-671-5p      | VSIG4          |
| miR-671-5p      | CAPN6          |
| miR-671-5p      | MATN4          |
| miR-671-5p      | CSF3R          |
| miR-671-5p      | DVL3           |
| miR-671-5p      | ANKRD25        |
| miR-671-5p      | KLF6           |
| miR-671-5p      | CSNK2A2        |
| miR-671-5p      | IGF2           |
| miR-671-5p      | KCNQ3          |
| miR-671-5p      | COL16A1        |
| miR-671-5p      | HSPH1          |
| miR-671-5p      | IL17RB         |
| miR-671-5p      | HDAC1          |

(Continued )

| <b>miRNA ID</b> | <b>mRNA ID</b> |
|-----------------|----------------|
| miR-671-5p      | HMGA2          |
| miR-671-5p      | SPTB           |
| miR-671-5p      | HRH3           |
| miR-671-5p      | GON4L          |
| miR-671-5p      | GFRA1          |
| miR-671-5p      | RHOBTB2        |
| miR-671-5p      | TRIP13         |
| miR-671-5p      | PTGDS          |
| miR-125a-3p     | CCDC28B        |
| miR-125a-3p     | CLPTM1         |
| miR-125a-3p     | TSC22D3        |
| miR-125a-3p     | FLNA           |
| miR-125a-3p     | KLHL20         |
| miR-125a-3p     | CDC123         |
| miR-125a-3p     | HSPA4          |
| miR-125a-3p     | ZNF3           |
| miR-125a-3p     | YY1            |
| miR-125a-3p     | ARRB2          |
| miR-125a-3p     | DDX54          |
| miR-125a-3p     | BMP4           |
| miR-125a-3p     | BNC2           |
| miR-125a-3p     | C21orf63       |
| miR-125a-3p     | MRRF           |
| miR-125a-3p     | MTA1           |
| miR-125a-3p     | C9orf89        |
| miR-125a-3p     | MLLT10         |
| miR-125a-3p     | GIT1           |
| miR-125a-3p     | MORN2          |
| miR-125a-3p     | TPT1           |
| miR-125a-3p     | CAST           |
| miR-125a-3p     | CALR           |
| miR-125a-3p     | GLI3           |
| miR-125a-3p     | NCLN           |
| miR-125a-3p     | TRIP12         |
| miR-125a-3p     | SIPA1L1        |
| miR-125a-3p     | RPL13A         |
| miR-125a-3p     | RPL30          |
| miR-125a-3p     | CLK2           |
| miR-125a-3p     | SMARCA2        |
| miR-125a-3p     | UBL5           |
| miR-125a-3p     | FOXC1          |

(Continued )

| <b>miRNA ID</b> | <b>mRNA ID</b> |
|-----------------|----------------|
| miR-125a-3p     | ZDHHC6         |
| miR-125a-3p     | MAPK9          |
| miR-125a-3p     | DACH1          |
| miR-125a-3p     | IGJ            |
| miR-188-5p      | UBE2I          |
| miR-188-5p      | H3F3B          |
| miR-188-5p      | SIPA1L2        |
| miR-188-5p      | CNIH           |
| miR-188-5p      | SERTAD3        |
| miR-188-5p      | ARPC2          |
| miR-188-5p      | EIF4A1         |
| miR-188-5p      | PLD3           |
| miR-188-5p      | EIF1           |
| miR-188-5p      | SUMF1          |
| miR-188-5p      | PAFAH1B1       |
| miR-188-5p      | C9orf6         |
| miR-188-5p      | RAB14          |
| miR-188-5p      | MCAT           |
| miR-188-5p      | B4GALT3        |
| miR-622         | ING1           |
| miR-622         | KRAS           |
| miR-622         | K-Ras          |

**Table S2: The significantly enriched KEGG pathways by targets of candidate miRNA biomarkers.**

| <b>Pathway ID</b> | <b>Pathway description</b>                             | <b>Gene count</b> | <b>False discovery rate</b> |
|-------------------|--------------------------------------------------------|-------------------|-----------------------------|
| 4520              | Adherens junction                                      | 13                | 1.30E-4                     |
| 5200              | Pathways in cancer                                     | 31                | 1.30E-4                     |
| 5206              | MicroRNAs in cancer                                    | 19                | 1.30E-4                     |
| 4010              | MAPK signaling pathway                                 | 25                | 4.64E-4                     |
| 5210              | Colorectal cancer                                      | 10                | 1.90E-3                     |
| 5220              | Chronic myeloid leukemia                               | 11                | 1.90E-3                     |
| 5166              | HTLV-I infection                                       | 23                | 2.15E-3                     |
| 5213              | Endometrial cancer                                     | 9                 | 2.15E-3                     |
| 5214              | Glioma                                                 | 10                | 2.15E-3                     |
| 5215              | Prostate cancer                                        | 12                | 2.15E-3                     |
| 4110              | Cell cycle                                             | 14                | 2.94E-3                     |
| 4114              | Oocyte meiosis                                         | 13                | 2.94E-3                     |
| 4151              | PI3K-Akt signaling pathway                             | 27                | 2.94E-3                     |
| 5223              | Non-small cell lung cancer                             | 9                 | 2.94E-3                     |
| 5218              | Melanoma                                               | 10                | 2.94E-3                     |
| 4810              | Regulation of actin cytoskeleton                       | 19                | 4.52E-3                     |
| 4141              | Protein processing in endoplasmic reticulum            | 16                | 5.06E-3                     |
| 4722              | Neurotrophin signaling pathway                         | 13                | 5.06E-3                     |
| 5202              | Transcriptional misregulation in cancer                | 16                | 5.23E-3                     |
| 5212              | Pancreatic cancer                                      | 9                 | 5.23E-3                     |
| 4152              | AMPK signaling pathway                                 | 13                | 5.93E-3                     |
| 5205              | Proteoglycans in cancer                                | 19                | 5.93E-3                     |
| 4360              | Axon guidance                                          | 13                | 7.15E-3                     |
| 5161              | Hepatitis B                                            | 14                | 7.15E-3                     |
| 5169              | Epstein-Barr virus infection                           | 17                | 7.15E-3                     |
| 4261              | Adrenergic signaling in cardiomyocytes                 | 14                | 7.71E-3                     |
| 4390              | Hippo signaling pathway                                | 14                | 1.05E-2                     |
| 4510              | Focal adhesion                                         | 17                | 1.34E-2                     |
| 4066              | HIF-1 signaling pathway                                | 11                | 1.35E-2                     |
| 5412              | Arrhythmogenic right ventricular cardiomyopathy (ARVC) | 9                 | 1.35E-2                     |
| 5152              | Tuberculosis                                           | 15                | 1.43E-2                     |
| 5034              | Alcoholism                                             | 13                | 1.45E-2                     |
| 4144              | Endocytosis                                            | 16                | 1.72E-2                     |
| 4720              | Long-term potentiation                                 | 8                 | 1.75E-2                     |
| 4914              | Progesterone-mediated oocyte maturation                | 9                 | 1.96E-2                     |
| 4530              | Tight junction                                         | 12                | 1.99E-2                     |
| 5216              | Thyroid cancer                                         | 5                 | 2.10E-2                     |
| 5203              | Viral carcinogenesis                                   | 15                | 2.15E-2                     |

|      |                                           |    |         |
|------|-------------------------------------------|----|---------|
| 4910 | Insulin signaling pathway                 | 12 | 2.53E-2 |
| 5222 | Small cell lung cancer                    | 9  | 2.61E-2 |
| 5221 | Acute myeloid leukemia                    | 7  | 2.68E-2 |
| 3015 | mRNA surveillance pathway                 | 9  | 2.92E-2 |
| 4630 | Jak-STAT signaling pathway                | 13 | 3.01E-2 |
| 4068 | FoxO signaling pathway                    | 11 | 3.06E-2 |
| 4370 | VEGF signaling pathway                    | 7  | 3.62E-2 |
| 3040 | Spliceosome                               | 11 | 3.66E-2 |
| 4725 | Cholinergic synapse                       | 10 | 3.66E-2 |
| 4014 | Ras signaling pathway                     | 16 | 4.13E-2 |
| 4350 | TGF-beta signaling pathway                | 8  | 4.13E-2 |
| 5016 | Huntington s disease                      | 14 | 4.13E-2 |
| 4015 | Rap1 signaling pathway                    | 15 | 4.78E-2 |
| 5142 | Chagas disease (American trypanosomiasis) | 9  | 4.79E-2 |
| 5211 | Renal cell carcinoma                      | 7  | 4.79E-2 |
| 3430 | Mismatch repair                           | 4  | 4.86E-2 |

**Table S3: The details of top 15 significantly enriched KEGG pathways.**

| NO. | Pathway                  | Gene count | FDR     | Matching proteins                                                                                                                                                         |
|-----|--------------------------|------------|---------|---------------------------------------------------------------------------------------------------------------------------------------------------------------------------|
| 1   | Adherens junction        | 13         | 1.30E-4 | CSNK2A2,CTNNA1,CTNNA3,EP300,FYN,LEF1,MAPK3,PVRL1,PVRL3,RHOA,SNAI2,TCF7L1,TJP1                                                                                             |
| 2   | Pathways in cancer       | 31         | 1.30E-4 | AKT2,ARAF,BAX,BCL2,BCL2L1,BMP4,CDK4,CDK6,CKS2,CSF2RA,CSF3R,CTNNA1,CTNNA3,DVL3,EP300,FAS,FGF1,FGFR2,GLI3,HDAC1,LEF1,MAP2K1,MAPK3,MAX,PIK3CD,RB1,RHOA,STK4,TCF7L1,TFG,WNT7A |
| 3   | MicroRNAs in cancer      | 19         | 1.30E-4 | BCL2,BCL2L2,CDK6,DNMT1,EP300,EZH2,EZR,HDAC1,HMGA2,MAP2K1,PLAU,RHOA,SHC1,SPRY2,STMN1,TPM3,TRIM71,UBE2I,VIM                                                                 |
| 4   | MAPK signaling pathway   | 25         | 4.64E-3 | AKT2,ARRB2,CACNA1G,CACNA2D1,CACNB1,FAS,FGF1,FGFR2,FLNA,MAP2K1,MAP3K1,MAP3K2,MAP3K4,MAPK3,MAPKAPK3,MAX,NR4A1,PAK2,PPP5C,RPS6KA1,RPS6KA3,RRAS,STK4,STMN1,TAOK3              |
| 5   | Colorectal cancer        | 10         | 1.90E-3 | AKT2,ARAF,BAX,BCL2,LEF1,MAP2K1,MAPK3,PIK3CD,RHOA,TCF7L1                                                                                                                   |
| 6   | Chronic myeloid leukemia | 11         | 1.90E-3 | AKT2,ARAF,BCL2L1,CDK4,CDK6,HDAC1,MAP2K1,MAPK3,PIK3CD,RB1,SHC1                                                                                                             |
| 7   | HTLV-I infection         | 23         | 2.15E-3 | AKT2,ATF3,BAX,BCL2L1,BUB3,CALR,CDC27,CDK4,DVL3,EP300,HLA-DRB1,MAP3K1,                                                                                                     |



|    |                            |    |          |                                                                                                                                                                  |
|----|----------------------------|----|----------|------------------------------------------------------------------------------------------------------------------------------------------------------------------|
|    |                            |    |          | MYB,NRP1,PCNA,PIK3CD,POLD4,RB1,RRAS,SLC25A5,TBP,TBPL1,WNT7A                                                                                                      |
| 8  | Endometrial cancer         | 9  | 2.15E-3  | AKT2,ARAF,CTNNA1,CTNNA3,LEF1,MAP2K1,MAPK3,PIK3CD,TCF7L1                                                                                                          |
| 9  | Glioma                     | 10 | 2.15E-3  | AKT2,ARAF,CAMK2G,CDK4,CDK6,MAP2K1,MAPK3,PIK3CD,RB1,SHC1                                                                                                          |
| 10 | Prostate cancer            | 12 | 2.15E-3  | AKT2,ARAF,BCL2,EP300,FGFR2,LEF1,MAP2K1,MAPK3,PDGFD,PIK3CD,RB1,TCF7L1                                                                                             |
| 11 | Cell cycle                 | 14 | 2.94E-3  | BUB3,CDC14A,CDC27,CDK4,CDK6,EP300,HDAC1,PCNA,PLK1,RB1,SMC1A,STAG2,TFDP1,YWHAQ                                                                                    |
| 12 | Oocyte meiosis             | 13 | 2.94E-3  | CAMK2G,CDC27,MAP2K1,MAPK3,PLK1,PPP1CA,PPP2CB,PPP2R1A,PPP2R5B,RPS6KA1,RPS6KA3,SMC1A,YWHAQ                                                                         |
| 13 | PI3K-Akt signaling pathway | 27 | 2.94E-3  | AKT2,BCL2,BCL2L1,CDK4,CDK6,COL5A1,COL6A3,CSF3R,CSH2,EIF4E2,EPHA2,FGF1,FGFR2,GNB2,ITGB8,KDR,MAP2K1,MAPK3,MYB,NR4A1,PDGFD,PIK3CD,PKN2,PPP2CB,PPP2R1A,PPP2R5B,YWHAQ |
| 14 | Non-small cell lung cancer | 9  | 2.94 E-3 | AKT2,ARAF,CDK4,CDK6,MAP2K1,MAPK3,PIK3CD,RB1,STK4                                                                                                                 |
| 15 | Melanoma                   | 10 | 3.84E-3  | AKT2,ARAF,CDK4,CDK6,FGF1,MAP2K1,MAPK3,PDGFD,PIK3CD,RB1                                                                                                           |

Note: FDR: False discovery rate

**Supplementary Table S4: PubMed citations of the DE miRNA targets**

| mRNA     | Associated with   |               |               | Reference(PMID)            |
|----------|-------------------|---------------|---------------|----------------------------|
|          | chemoradiotherapy | rectal cancer | other cancers |                            |
| AKAP11   | NO                | NO            | YES           | 19587378                   |
| ANKRD49  | NO                | NO            | YES           | 19920108                   |
| ARIH2    | NO                | NO            | YES           | 21454682                   |
| ARMC8    | NO                | NO            | YES           | 28081738                   |
| ARPC4    | NO                | NO            | YES           | 26648486                   |
| ARRB2    | YES               | NO            | YES           | 22315403; 26273408         |
| ATP1A1   | YES               | YES           | YES           | 23910267;26835885;27845894 |
| CAST     | YES               | YES           | YES           | 15807633;15466976;27323818 |
| CDC14A   | YES               | YES           | YES           | 28386351;26747605;27323075 |
| CYB5A    | NO                | NO            | YES           | 25225034                   |
| DNER     | NO                | YES           | YES           | 17143535; 19544453         |
| EPHA2    | YES               | YES           | YES           | 18339848;28165374;27804871 |
| EPS8L3   | NO                | YES           | YES           | 19223546; 19223546         |
| FGFR2    | YES               | YES           | YES           | 26831663;24968263;28430863 |
| HIPK2    | YES               | YES           | YES           | 21785465;25282590;28107201 |
| HSD17B11 | NO                | NO            | YES           | 21549806                   |
| IRF8     | YES               | YES           | YES           | 27098631;25495942;26563595 |
| IVNS1ABP | NO                | NO            | YES           | 25619834                   |
| KCNK1    | NO                | NO            | YES           | 18239687                   |
| KCNMA1   | NO                | YES           | YES           | 24367615; 28231797         |
| KIAA0802 | NO                | NO            | NO            | NA                         |
| KLK10    | NO                | YES           | YES           | 23499583; 27825132         |
| MYO5A    | NO                | YES           | YES           | 19521958; 21300763         |
| NOL3     | YES               | YES           | YES           | 21273594;21859567;26709830 |
| PRG4     | NO                | NO            | YES           | 28192118                   |
| PTPRD    | NO                | YES           | YES           | 26847345; 28345455         |
| RCE1     | NO                | NO            | YES           | 26546252                   |
| RFC3     | NO                | YES           | YES           | 20573375; 2788870          |
| RGS12    | YES               | YES           | YES           | 21698121;12461749;21209843 |
| RUSC2    | NO                | NO            | YES           | 27238570                   |
| SEMA6A   | YES               | YES           | YES           | 15917651;17671748;17671748 |
| SERF2    | NO                | NO            | NO            | NA                         |
| SF1      | YES               | YES           | YES           | 28284009;17900258;17383426 |
| SLC25A5  | NO                | NO            | YES           | 19140237                   |
| SMUG1    | YES               | YES           | YES           | 24253812;24036853;24229683 |
| STAG2    | YES               | YES           | YES           | 28169993;22668012;28302680 |
| TBC1D17  | NO                | YES           | YES           | 27217703; 24752605         |
| TFAP2B   | YES               | YES           | YES           | 20581741;22511254;24766673 |
| TFDP1    | YES               | YES           | YES           | 24598828;25133581;27871936 |

|         |     |     |     |                            |
|---------|-----|-----|-----|----------------------------|
| TIPARP  | YES | NO  | YES | 26267320; 21712449         |
| TMC7    | YES | YES | NO  | 24316942; 24316942;        |
| TMEM156 | NO  | NO  | YES | 26427334                   |
| TPST2   | YES | NO  | YES | 11322664; 27992415         |
| WTAP    | YES | YES | YES | 21150717;26071132;27370540 |
